# Supplementary material for: Chemometric modeling of larvicidal activity of plant derived compounds against zika virus vectorAedes aegypti: application of ETA indices
Source: Royal Society of Chemistry journal article supplement (doi:10.1039/c7ra13159c), 2018-01-01

**Chemometric modeling of larvicidal activity of plant derived  
compounds against zika virus vector *Aedes aegypti*: Application of  
ETA indices**

**Priyanka De, Rahul B Aher and Kunal Roy\***

Drug Theoretics and Cheminformatics Laboratory,

Department of Pharmaceutical Technology,

Jadavpur University, Kolkata 700 032, India,

Email: [kunalroy\\_in@yahoo.com](mailto:kunalroy_in@yahoo.com) ; [kunal.roy@jadavpuruniversity.in](mailto:kunal.roy@jadavpuruniversity.in)

Phone: +91 98315 94140; Fax: +91-33-2837-1078;

URL: <http://sites.google.com/site/kunalroyindia/>

**SUPPLEMENTARY MATERIALS**

Table S1. Molecular structures of the compounds used with their larvicidal activity data against *Aedes aegypti*.

| Compound no. | Compound name | Structure                                                                           | LC50 in ppm | pLC50 LC(mol/L) | Reference                  |
|--------------|---------------|-------------------------------------------------------------------------------------|-------------|-----------------|----------------------------|
| 1            | (-)-Camphene  | 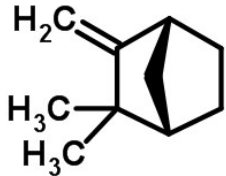   | 220         | -               | Santos, 2010               |
| 2            | (±)-camphor   |   | 657         | -               | Santos,2010                |
| 3            | 1,4-cineole   |  | 751         | 2.3             | Santos,2010<br>Scotti,2014 |
| 4            | 1,8-cineole   |  | 1419        | 2.04            | Santos,2010<br>Scotti,2014 |
| 5            | carvacrol     |  | 69          | 3.47            | Santos,2010<br>Scotti,2014 |

|    |                                                   |                                                                                                                                           |   |      |             |
|----|---------------------------------------------------|-------------------------------------------------------------------------------------------------------------------------------------------|---|------|-------------|
| 6  | carvacryl acetate                                 | 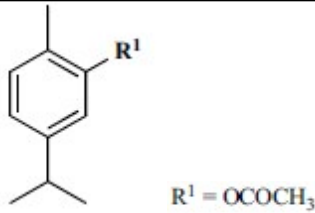 <p><math>R^1 = \text{OCOCH}_3</math></p>                | - | 3.32 | Scotti,2014 |
| 7  | carvacryl chloroacetate                           |  <p><math>R^1 = \text{OCOCH}_2\text{Cl}</math></p>       | - | 3.64 | Scotti,2014 |
| 8  | carvacryl trichloroacetate                        |  <p><math>R^1 = \text{OCCl}_3</math></p>                 | - | 3.59 | Scotti,2014 |
| 9  | carvacryl propionate                              |  <p><math>R^1 = \text{OCOCH}_2\text{CH}_3</math></p>    | - | 3.49 | Scotti,2014 |
| 10 | carvacryl benzoate                                |  <p><math>R^1 = \text{OCOPh}</math></p>                | - | 3.66 | Scotti,2014 |
| 11 | 2-Hydroxy-3-methyl-6-(1-methylethyl)-benzaldehyde |  <p><math>R^3 = \text{OH}, R^4 = \text{CHO}</math></p> | - | 3.43 | Scotti,2014 |

|    |                         |                                                                                                                          |   |      |             |
|----|-------------------------|--------------------------------------------------------------------------------------------------------------------------|---|------|-------------|
| 12 | carvacrylglycolic acid  | 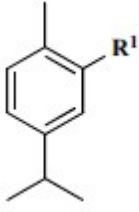<br>$R^1 = \text{OCH}_2\text{COOH}$     | - | 3.09 | Scotti,2014 |
| 13 | thymyl acetate          | <br>$R^2 = \text{OCOCH}_3$              | - | 3.32 | Scotti,2014 |
| 14 | thymyl chloroacetate    | <br>$R^2 = \text{OCOCH}_2\text{Cl}$     | - | 3.66 | Scotti,2014 |
| 15 | thymyl trichloroacetate | <br>$R^2 = \text{OCOCCl}_3$            | - | 3.85 | Scotti,2014 |
| 16 | thymyl propionate       | <br>$R^2 = \text{OCOCH}_2\text{CH}_3$ | - | 3.49 | Scotti,2014 |
| 17 | thymyl benzoate         | <br>$R^2 = \text{OCOPh}$              | - | 3.46 | Scotti,2014 |

|    |                                                   |                                                                                                                           |      |      |                            |
|----|---------------------------------------------------|---------------------------------------------------------------------------------------------------------------------------|------|------|----------------------------|
| 18 | thymyl ethyl ether                                | 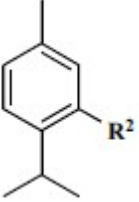 <p><math>R^2 = OCH_2CH_3</math></p>     | -    | 3.16 | Scotti,2014                |
| 19 | 2-hydroxy-6-methyl-3-(1-methylethyl)-benzaldehyde |  <p><math>R^3 = CHO, R^4 = OH</math></p> | -    | 3.72 | Scotti,2014                |
| 20 | thymoxyacetic acid                                |  <p><math>R^2 = OCH_2COOH</math></p>     | -    | 2.65 | Scotti,2014                |
| 21 | 5-norbornene-2-ol                                 |                                         | 759  | 2.16 | Santos,2010<br>Scotti,2014 |
| 22 | 5-norbornene-2,2-dimethanol                       |                                        | 785  | 2.29 | Santos,2010<br>Scotti,2014 |
| 23 | 5-norbornene-2-endo-3-endodimethanol              |                                        | 1407 | 2.04 | Santos,2010<br>Scotti,2014 |
| 24 | 5-norbornene-2-exo-3-exo-dimethanol               |                                        | 717  | 2.33 | Santos,2010<br>Scotti,2014 |

|    |                                                    |                                                                                     |             |      |                                              |
|----|----------------------------------------------------|-------------------------------------------------------------------------------------|-------------|------|----------------------------------------------|
| 25 | eugenyl acetate                                    | 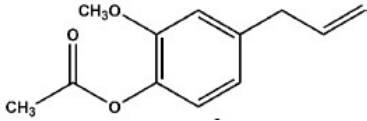   | 113.3       | 3.28 | Barbosa,2010<br>Scotti,2014                  |
| 26 | 2-[2-methoxy-4-(2-propen-1-yl)phenoxy] acetic acid |    | 295.9       | 3.04 | Barbosa,2010<br>Scotti,2014                  |
| 27 | borneol                                            |    | 610         | 2.40 | Santos 2010                                  |
| 28 | Catechol                                           |    | 243         | 2.66 | Santos 2010                                  |
| 29 | 1-ethoxy-2-methoxy-4-(2-propen-1-yl)-benzene       |  | 67.2        | 3.40 | Barbosa 2012                                 |
| 30 | Eugenol                                            |  | 88,<br>93.3 | 3.35 | Santos 2010,<br>Barbosa 2012,<br>Scotti 2014 |
| 31 | Phenol                                             |  | 194         | 2.69 | Santos 2010                                  |
| 32 | gamma-terpinene                                    |  | 56          | 3.39 | Santos 2011                                  |

|    |                                                 |                                                                                     |     |      |                     |
|----|-------------------------------------------------|-------------------------------------------------------------------------------------|-----|------|---------------------|
| 33 | guaiacol                                        | 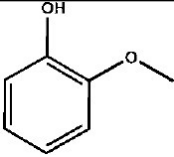   | 177 | 2.84 | Santos 2010         |
| 34 | 1-benzoate-2-methoxy-4-(3-hydroxypropyl)-phenol |    | -   | 3.28 | Scotti              |
| 35 | 4-hydroxy-3-methoxy-benzenepropanol             |    | -   | 2.05 | Scotti              |
| 36 | isoborneol                                      |    | 598 | 2.41 | Santos 2010, Scotti |
| 37 | (-)-isopulegol                                  |  | 297 | 2.71 | Santos 2011, Scotti |
| 38 | Thymol                                          |  | 81  | 2.59 | Santos 2010, Scotti |
| 39 | menthone                                        |  | 508 | 2.48 | Santos 2011, Scotti |

|    |                                          |                                                                                     |       |      |                         |
|----|------------------------------------------|-------------------------------------------------------------------------------------|-------|------|-------------------------|
| 40 | nonan-2-one<br>(40),                     | 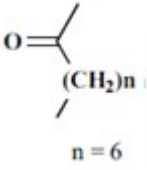   | -     | 2.85 | Scotti                  |
| 41 | undecan-2-one<br>(41),                   |    | -     | 3.51 | Scotti                  |
| 42 | 1,2-dimethoxy-4-(2-propen-1-yl)-benzene  |   | 107.3 | 3.24 | Barbosa 2012,<br>Scotti |
| 43 | neoisopulegol                            |    | 554   | 2.44 | Santos 2011,<br>Scotti  |
| 44 | 1,2-carvone oxide                        |   | 219   | 2.88 | Santos 2011,<br>Scotti  |
| 45 | Limonene oxide, mixture of cis and trans |  | 517   | 2.47 | Santos 2011,<br>Scotti  |
| 46 | <i>p</i> -cymene                         |  | 51    | 3.42 | Santos 2010,<br>Scotti  |
| 47 | eugenyl propionate                       |  | 97.2  | 3.55 | Barbosa 2012,<br>Scotti |



|    |                 |                                                                                     |     |      |                        |
|----|-----------------|-------------------------------------------------------------------------------------|-----|------|------------------------|
| 48 | R-carvone       | 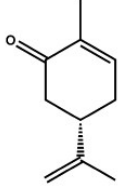   | 152 | 3.00 | Santos 2011,<br>Scotti |
| 49 | resorcinol      |    | 577 | 2.28 | Santos 2010,<br>Scotti |
| 50 | R-limonene      |    | 27  | 3.70 | Santos 2011,<br>Scotti |
| 51 | R/S-carvone     |   | 118 | 3.11 | Santos 2011,<br>Scotti |
| 52 | Salicylaldehyde |  | 136 | 2.95 | Santos 2010,<br>Scotti |
| 53 | S-Carvone       |  | 124 | 3.08 | Santos 2011,<br>Scotti |

|    |                                                                               |                                                                                      |       |      |                        |
|----|-------------------------------------------------------------------------------|--------------------------------------------------------------------------------------|-------|------|------------------------|
| 54 | S-limonene                                                                    | 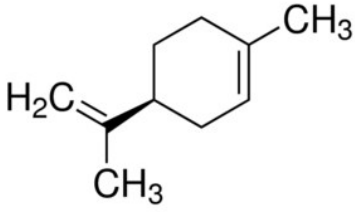    | 30    | 3.64 | Santos 2011,<br>Scotti |
| 55 | vanillin                                                                      |     | 513   | 2.47 | Santos 2010,<br>Scotti |
| 56 | (1R,2R,5R)-2-Methyl-5-(1-methylethenyl)-3-oxo-cyclohexanecarbonitrile         |     | 412   | -    | Santos,2011            |
| 57 | 1-Benzoate-2-methoxy-4-(2-propen-1-yl)-Phenol                                 |   | 706.8 | -    | Barbosa 2012           |
| 58 | 1-[[[1,1-Dimethylethyl)dimethylsilyl]oxy]-2-methoxy-4-(2-propen-1-yl)-benzene |  | 278.9 | -    | Barbosa 2012           |
| 59 | 3-Carene                                                                      |   | 150   | -    | Santos,2011            |

|    |              |                                                                                   |     |   |             |
|----|--------------|-----------------------------------------------------------------------------------|-----|---|-------------|
| 60 | Menthol      | 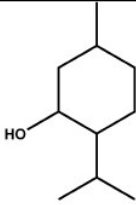 | 404 | - | Santos,2011 |
| 61 | (+)-Camphene |  | 406 | - | Santos,2010 |

Table S2. The values of descriptors appearing in Eq. (1) and computed larvicidal activity values for both training and test set compounds

| Sl. No.      | ETA_EtaP_F | ETA_dEpsilon_D | ETA_dAlpha_B | ETA_BetaP_s | ETA_dEpsilon_C | pLC50(obs) | pLC50(pred) |
|--------------|------------|----------------|--------------|-------------|----------------|------------|-------------|
| Training set |            |                |              |             |                |            |             |
| 2            | 0.221      | 0              | 0.015        | 0.568       | -0.049         | 2.36       | 2.67        |
| 3            | 0.107      | 0              | 0.015        | 0.591       | -0.036         | 2.31       | 2.36        |
| 5            | 0.573      | 0.039          | 0.015        | 0.523       | -0.033         | 3.34       | 3.14        |
| 7            | 0.662      | 0              | 0.008        | 0.567       | -0.095         | 3.64       | 3.42        |
| 8            | 0.67       | 0              | 0            | 0.588       | -0.155         | 3.59       | 3.53        |
| 10           | 0.848      | 0              | 0.018        | 0.566       | -0.048         | 3.66       | 3.42        |
| 11           | 0.704      | 0.037          | 0.026        | 0.538       | -0.071         | 3.43       | 3.16        |
| 13           | 0.666      | 0              | 0.024        | 0.554       | -0.065         | 3.32       | 3.22        |
| 14           | 0.665      | 0              | 0.008        | 0.567       | -0.095         | 3.66       | 3.42        |
| 16           | 0.647      | 0              | 0.022        | 0.55        | -0.06          | 3.49       | 3.24        |
| 17           | 0.852      | 0              | 0.018        | 0.566       | -0.048         | 3.46       | 3.42        |
| 18           | 0.537      | 0              | 0.013        | 0.538       | -0.028         | 3.16       | 3.23        |
| 20           | 0.696      | 0.035          | 0.033        | 0.567       | -0.091         | 2.65       | 2.93        |
| 21           | 0.234      | 0.055          | 0.021        | 0.594       | -0.053         | 2.16       | 2.16        |
| 23           | 0.297      | 0.083          | 0.03         | 0.591       | -0.078         | 2.04       | 2.04        |
| 24           | 0.297      | 0.083          | 0.03         | 0.591       | -0.078         | 2.33       | 2.04        |
| 25           | 0.808      | 0              | 0.033        | 0.583       | -0.091         | 3.26       | 3.15        |
| 28           | 0.709      | 0.118          | 0.042        | 0.562       | -0.103         | 2.66       | 2.43        |
| 29           | 0.699      | 0              | 0.024        | 0.571       | -0.054         | 3.46       | 3.13        |
| 31           | 0.632      | 0.064          | 0.024        | 0.536       | -0.054         | 2.69       | 2.93        |
| 32           | 0.235      | 0              | 0            | 0.5         | 0              | 3.39       | 3.20        |
| 33           | 0.7        | 0.057          | 0.037        | 0.583       | -0.09          | 2.85       | 2.66        |
| 35           | 0.668      | 0.077          | 0.038        | 0.577       | -0.094         | 2.05       | 2.54        |
| 36           | 0.101      | 0.039          | 0.015        | 0.568       | -0.036         | 2.41       | 2.29        |
| 37           | 0.244      | 0.039          | 0.015        | 0.523       | -0.033         | 2.72       | 2.73        |
| 39           | 0.219      | 0              | 0.015        | 0.523       | -0.045         | 2.48       | 2.94        |
| 40           | 0.204      | 0              | 0.017        | 0.475       | -0.045         | 2.85       | 3.19        |
| 42           | 0.731      | 0              | 0.026        | 0.577       | -0.059         | 3.22       | 3.12        |
| 44           | 0.422      | 0              | 0.028        | 0.604       | -0.085         | 2.88       | 2.60        |
| 45           | 0.235      | 0              | 0.015        | 0.591       | -0.036         | 2.47       | 2.52        |
| 46           | 0.496      | 0              | 0            | 0.5         | 0              | 3.42       | 3.53        |
| 49           | 0.705      | 0.118          | 0.042        | 0.562       | -0.103         | 2.28       | 2.43        |

|          |       |       |       |       |        |      |      |
|----------|-------|-------|-------|-------|--------|------|------|
| 50       | 0.265 | 0     | 0     | 0.5   | 0      | 3.7  | 3.24 |
| 51       | 0.479 | 0     | 0.015 | 0.523 | -0.045 | 3.1  | 3.26 |
| 52       | 0.754 | 0.057 | 0.037 | 0.556 | -0.111 | 2.95 | 2.94 |
| 53       | 0.479 | 0     | 0.015 | 0.523 | -0.045 | 3.08 | 3.26 |
| 57       | 0.959 | 0     | 0.025 | 0.588 | -0.068 | 2.58 | 3.37 |
| 58       | 0.663 | 0     | 0     | 0.592 | -0.025 | 3    | 3.22 |
| 59       | 0.116 | 0     | 0     | 0.55  | 0      | 2.96 | 2.75 |
| 60       | 0.1   | 0.039 | 0.015 | 0.523 | -0.033 | 2.59 | 2.56 |
| 61       | 0.161 | 0     | 0     | 0.55  | 0      | 2.53 | 2.80 |
| Test set |       |       |       |       |        |      |      |
| 1        | 0.161 | 0     | 0     | 0.55  | 0      | 2.79 | 2.8  |
| 4        | 0.11  | 0     | 0.015 | 0.591 | -0.036 | 2.04 | 2.36 |
| 6        | 0.644 | 0     | 0.022 | 0.55  | -0.06  | 3.32 | 3.24 |
| 9        | 0.644 | 0     | 0.022 | 0.55  | -0.06  | 3.49 | 3.24 |
| 12       | 0.693 | 0.035 | 0.033 | 0.567 | -0.091 | 3.09 | 2.92 |
| 15       | 0.673 | 0     | 0     | 0.588 | -0.155 | 3.85 | 3.54 |
| 19       | 0.703 | 0.037 | 0.026 | 0.538 | -0.071 | 3.72 | 3.15 |
| 22       | 0.306 | 0.083 | 0.03  | 0.591 | -0.078 | 2.29 | 2.05 |
| 26       | 0.831 | 0.035 | 0.042 | 0.594 | -0.116 | 2.88 | 2.86 |
| 27       | 0.101 | 0.039 | 0.015 | 0.568 | -0.036 | 2.4  | 2.29 |
| 30       | 0.737 | 0.041 | 0.028 | 0.562 | -0.065 | 3.26 | 2.99 |
| 34       | 0.908 | 0.025 | 0.032 | 0.595 | -0.087 | 3.28 | 3.07 |
| 38       | 0.575 | 0.039 | 0.015 | 0.523 | -0.033 | 3.27 | 3.14 |
| 41       | 0.179 | 0     | 0.014 | 0.479 | -0.037 | 3.51 | 3.16 |
| 43       | 0.244 | 0.039 | 0.015 | 0.523 | -0.033 | 2.44 | 2.73 |
| 47       | 0.788 | 0     | 0.031 | 0.578 | -0.084 | 3.36 | 3.17 |
| 48       | 0.479 | 0     | 0.015 | 0.523 | -0.045 | 2.99 | 3.26 |
| 54       | 0.265 | 0     | 0     | 0.5   | 0      | 3.66 | 3.24 |
| 55       | 0.806 | 0.051 | 0.045 | 0.591 | -0.135 | 2.47 | 2.76 |
| 56       | 0.542 | 0     | 0.021 | 0.538 | -0.079 | 2.63 | 3.24 |

Figure S1: DModX value of training set and test set compounds at 99% confidence level for the developed PLS model. The thick horizontal line signifies the critical DModX value (0.00999898) at the 99% confidence level.

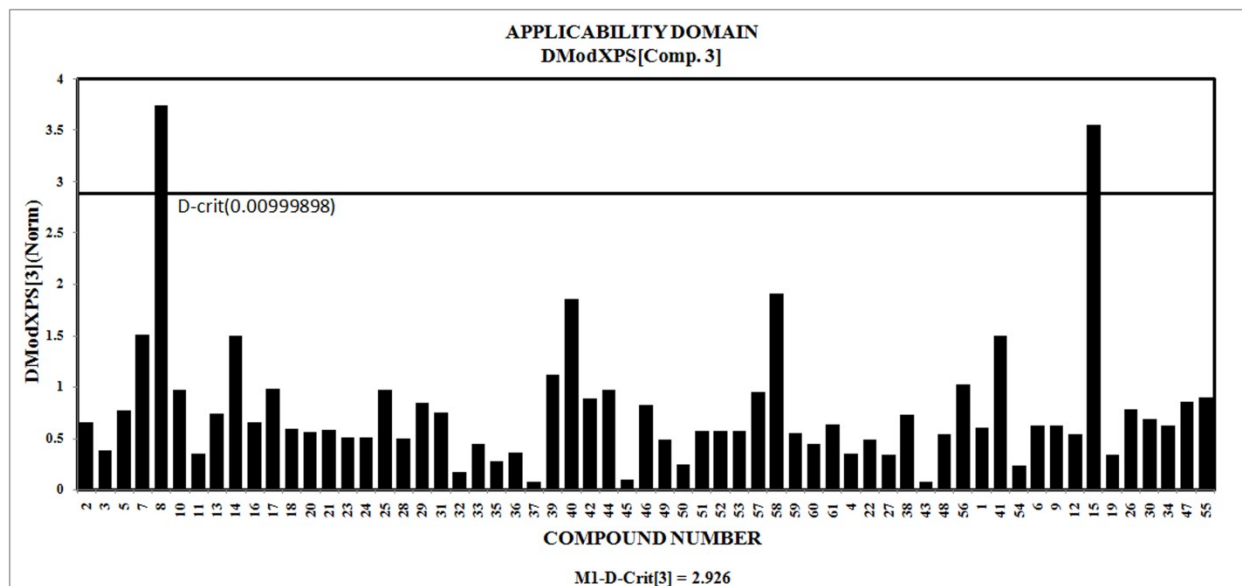

Figure S2: Randomization model for final PLS model

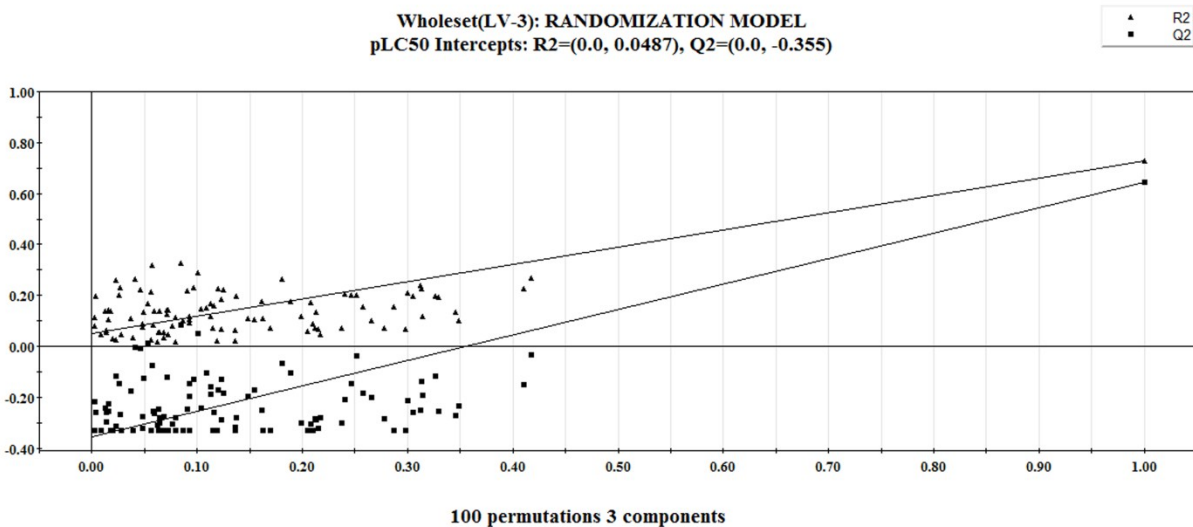

Supplement: c7ra13159c1.pdf [file c7ra13159c1.pdf]
